# Supplementary material for: Facile synthesis of a high electrical and ion conductivity junction-less 3D carbon sponge electrode for self-standing lithium ion battery anode
Source: Royal Society of Chemistry journal article supplement (doi:10.1039/c7ra12759f), 2018-01-01
Supplement: c7ra12759f1.pdf [file c7ra12759f1.pdf]

Supporting Information

## **Facile synthesis of high electric and ion conductivity junction-less 3D carbon sponge electrode for self-standing lithium ion battery anode**

Jyunichiro Abe, Yuta Kobayashi, Koki Kawase, Mizuki Tenjimbayashi and Seimei Shiratori

**Affiliation:** Graduate School of Science and Technology, Keio University

**Author Address:** Graduate School of Science and Technology, Keio University, Hiyoshi 3-14-1, Kohoku-ku,  
Yokohama city, Japan

Tel: +81-045-566-1602

E-mail: shiratori@appi.keio.ac.jp

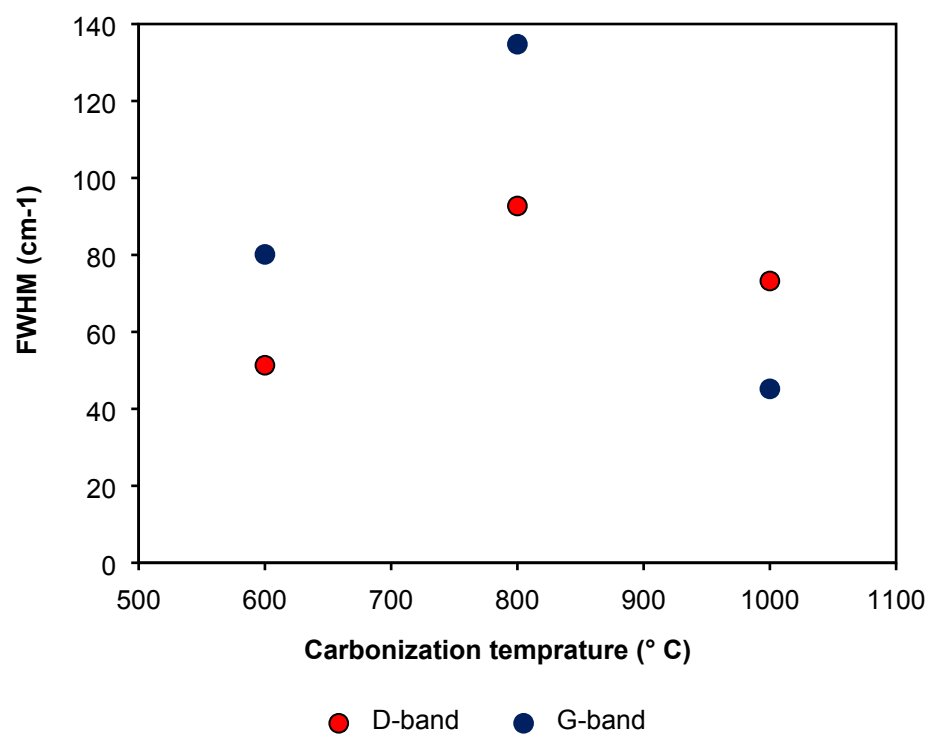

**Fig. S1** Raman spectrum full width at half maximum of 3DCS after carbonization at 600 ° C, 800 ° C and 1000 ° C.

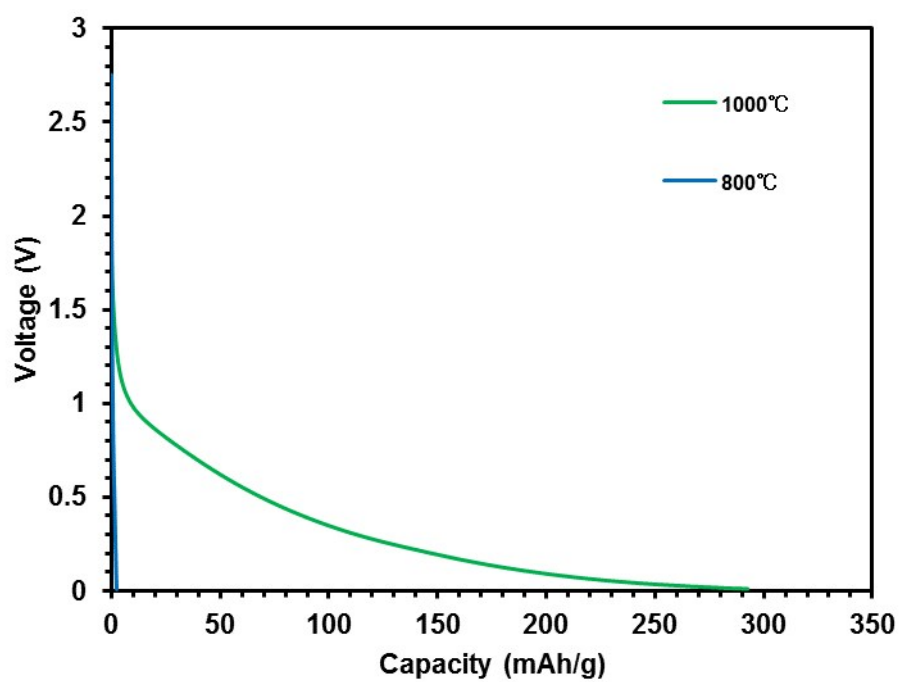

**Fig. S2** Discharge curve of 3DCS after carbonization at 800 ° C and 1000 ° C at 50mA/g.
